# Supplementary material for: Polysubstance Use among Maryland High School Students: Variations across County-Level School Districts
Source: MDPI journal article supplement (doi:10.3390/ijerph21050639), 2024-05-17
Supplement: s1 [file s1]

**Table S1.** Weighted prevalence (%) of Maryland high school students who reported past 30-day and lifetime substance use across frequency responses in 2018.

|                              | Any   | 0 days  | 1 or 2 days  | 3 to 5 days     | 6 to 9 days    | 10 to 19 days  | 20 to 29 days    | All 30 days | Missing |
|------------------------------|-------|---------|--------------|-----------------|----------------|----------------|------------------|-------------|---------|
| Cigarette, past 30-day       | 4.88  | 93.72   | 2.07         | 0.70            | 0.57           | 0.49           | 0.28             | 0.77        | 1.39    |
| Cigar/cigarillo, past 30-day | 5.89  | 91.83   | 2.55         | 1.19            | 0.88           | 0.40           | 0.26             | 0.61        | 2.29    |
| E-Cigarette, past 30-day     | 20.97 | 70.12   | 7.97         | 3.60            | 2.09           | 2.32           | 1.64             | 3.35        | 8.91    |
| Alcohol, past 30-day         | 22.15 | 69.96   | 12.56        | 4.96            | 2.45           | 1.21           | 0.38             | 0.59        | 7.88    |
|                              | Any   | 0 times | 1 or 2 times | 3 to 9 times    | 10 to 19 times | 20 to 39 times | 40 or more times | --          | Missing |
| Cannabis, past 30-day        | 16.26 | 76.35   | 6.77         | 4.02            | 1.92           | 1.48           | 2.07             | --          | 7.39    |
| NMPO, lifetime               | 13.89 | 81.46   | 6.51         | 3.56            | 1.73           | 0.79           | 1.30             | --          | 4.65    |
| Cocaine, lifetime            | 4.60  | 90.79   | 2.12         | 0.88            | 0.53           | 0.37           | 0.70             | --          | 4.61    |
| Heroin, lifetime             | 3.51  | 91.17   | 1.39         | 0.94            | 0.44           | 0.19           | 0.55             | --          | 5.31    |
| Methamphetamine, lifetime    | 3.50  | 91.66   | 1.51         | 0.69            | 0.45           | 0.19           | 0.66             | --          | 4.84    |
|                              | Any   | 0 times | 1 time       | 2 or more times | --             | --             | --               | --          | Missing |
| IDU, lifetime                | 3.83  | 90.04   | 2.39         | 1.44            | --             | --             | --               | --          | 6.13    |

Note: NMPO = non-medical prescription opioid, IDU = injection drug use.

**Table S2.** Fit Statistics for Latent Class Analysis, n=41,019

|                                                                     | <b>Latent Class Models</b> |                                    |                                           |                                 |                                 |
|---------------------------------------------------------------------|----------------------------|------------------------------------|-------------------------------------------|---------------------------------|---------------------------------|
| <b>Fit statistic</b>                                                | <b>1 class</b>             | <b>2 class</b>                     | <b>3 class*</b>                           | <b>4 class</b>                  | <b>5 class</b>                  |
| No. of parameters                                                   | 9                          | 19                                 | <b>29</b>                                 | 39                              | 49                              |
| Model maximum Log-likelihood value                                  | -119,950.90                | -99,051.31                         | <b>-92,688.93</b>                         | -92,260.68                      | -91,896.29                      |
| Akaike's Information Criterion (AIC)                                | 239,919.80                 | 198,140.63                         | <b>185,435.86</b>                         | 184,599.36                      | 183,890.57                      |
| Bayesian Information Criterion (BIC)                                | 239,997.37                 | 198,304.39                         | <b>185,685.82</b>                         | 184,935.52                      | 184,312.92                      |
| Sample Size Adjusted BIC                                            | 239,968.77                 | 198,244.01                         | <b>185,593.66</b>                         | 184,811.58                      | 184,157.19                      |
| Entropy                                                             | N/A                        | .836                               | <b>.867</b>                               | .832                            | .845                            |
| Vuong-Lo-Mendel-Rubin Likelihood Ratio Test ( <i>p</i> )            | N/A                        | 41,799.18<br>( <i>&lt; .0001</i> ) | <b>12,724.76</b><br>( <i>&lt; .0001</i> ) | 856.50<br>( <i>&lt; .0001</i> ) | 728.80<br>( <i>&lt; .0001</i> ) |
| Lo-Mendel-Rubin Likelihood Ratio Test LMR-LRT ( <i>p</i> )          | N/A                        | 41,409.23<br>( <i>&lt; .0001</i> ) | <b>12,606.05</b><br>( <i>&lt; .0001</i> ) | 848.51<br>( <i>&lt; .0001</i> ) | 722.00<br>( <i>&lt; .0001</i> ) |
| Size of each of the component classes for each <i>c</i> class model |                            |                                    |                                           |                                 |                                 |
| Class 1                                                             | 100%                       | 72.8%                              | <b>71.6%</b>                              | 70.4%                           | 70.5%                           |
| Class 2                                                             | --                         | 27.2%                              | <b>23.1%</b>                              | 20.8%                           | 20.4%                           |
| Class 3                                                             | --                         | --                                 | <b>5.3%</b>                               | 4.9%                            | 4.0%                            |
| Class 4                                                             | --                         | --                                 | --                                        | 3.9%                            | 2.7%                            |
| Class 5                                                             | --                         | --                                 | --                                        | --                              | 2.3%                            |

\* The 3-class model was the preferred solution based on fit statistics.

**Table S3.** Model Comparison for Stepwise DIF Testing for County with 3-Class Model of Polysubstance Use

| Procedure | Model  | Model Description    |                                                                                                                                      | LL         | npar | Comparison    | LRT     | df  | p       |
|-----------|--------|----------------------|--------------------------------------------------------------------------------------------------------------------------------------|------------|------|---------------|---------|-----|---------|
| 1         | M1.0   | MIMIC                | No DIF                                                                                                                               | -92,147.61 | 75   | M1.0 vs. M1.1 | 2456.76 | 621 | < .0001 |
|           | M1.1   |                      | All DIF                                                                                                                              | -90,919.23 | 696  |               |         |     |         |
| 2         | M2.0.1 | Combustible          | No DIF                                                                                                                               | -37,057.19 | 51   | M2.0.1 vs     | 146.32  | 69  | < .0001 |
|           | M2.1.1 | Tobacco              | NU DIF                                                                                                                               | -36,984.03 | 120  | M2.1.1        |         |     |         |
|           | M2.0.2 | E-cigarettes         | No DIF                                                                                                                               | -39,963.76 | 51   | M2.0.2 vs     | 416.18  | 69  | < .0001 |
|           | M2.1.2 |                      | NU DIF                                                                                                                               | -39,755.67 | 120  | M2.1.2        |         |     |         |
|           | M2.0.3 | Alcohol              | No DIF                                                                                                                               | -42,963.42 | 51   | M2.0.3 vs     | 194.39  | 69  | < .0001 |
|           | M2.1.3 |                      | NU DIF                                                                                                                               | -42,866.22 | 120  | M2.1.3        |         |     |         |
|           | M2.0.4 | Cannabis             | No DIF                                                                                                                               | -39,998.09 | 51   | M2.0.4 vs     | 561.46  | 69  | < .0001 |
|           | M2.1.4 |                      | NU DIF                                                                                                                               | -39,717.36 | 120  | M2.1.4        |         |     |         |
|           | M2.0.5 | NMPO                 | No DIF                                                                                                                               | -43,088.65 | 51   | M2.0.5 vs     | 358.81  | 69  | < .0001 |
|           | M2.1.5 |                      | NU DIF                                                                                                                               | -42,909.25 | 120  | M2.1.5        |         |     |         |
|           | M2.0.6 | Cocaine              | No DIF                                                                                                                               | -32,439.71 | 51   | M2.0.6 vs     | 103.79  | 69  | .004    |
|           | M2.1.6 |                      | NU DIF                                                                                                                               | -32,387.82 | 120  | M2.1.6        |         |     |         |
|           | M2.0.7 | Heroin               | No DIF                                                                                                                               | -31,127.39 | 51   | M2.0.7 vs     | 50.44   | 69  | .955    |
|           | M2.1.7 |                      | NU DIF                                                                                                                               | -31,102.17 | 120  | M2.1.7        |         |     |         |
|           | M2.0.8 | Metham-<br>phetamine | No DIF                                                                                                                               | -31,461.97 | 51   | M2.0.8 vs     | 52.39   | 69  | .932    |
|           | M2.1.8 |                      | NU DIF                                                                                                                               | -31,435.77 | 120  | M2.1.8        |         |     |         |
|           | M2.0.9 | IDU                  | No DIF                                                                                                                               | -33,069.77 | 51   | M2.0.9 vs     | 94.61   | 69  | .022    |
|           | M2.1.9 |                      | NU DIF                                                                                                                               | -33,022.47 | 120  | M2.1.9        |         |     |         |
| 3         | M3.0   | MIMIC                | Combustible tobacco, e-cigarettes, alcohol, cannabis, NMPO, cocaine, IDU w/ NU DIF; heroin and methamphetamine w/ no DIF             | -91,001.40 | 558  | M1.0 vs M3.0  | 2292.42 | 483 | < .0001 |
|           |        |                      |                                                                                                                                      |            |      | M3.0 vs M1.1  | 164.34  | 138 | .063    |
| 4         | M4.1   | MIMIC                | Combustible tobacco w/ U DIF; all others w/ NU DIF                                                                                   | -91,035.82 | 512  | M4.1 vs M3.0  | 68.83   | 46  | .016    |
|           | M4.2   |                      | E-cigarettes w/ U DIF; all others w/ NU DIF                                                                                          | -91,087.93 | 512  | M4.2 vs M3.0  | 173.06  | 46  | < .0001 |
|           | M4.3   |                      | Alcohol w/ U DIF; all others w/ NU DIF                                                                                               | -91,041.39 | 512  | M4.3 vs M3.0  | 79.99   | 46  | .001    |
|           | M4.4   |                      | Cannabis w/ U DIF; all others w/ NU DIF                                                                                              | -91,088.93 | 512  | M4.4 vs M3.0  | 175.05  | 46  | < .0001 |
|           | M4.5   |                      | NMPO w/ U DIF; all others w/ NU DIF                                                                                                  | -91,059.57 | 512  | M4.5 vs M3.0  | 116.34  | 46  | < .0001 |
|           | M4.6   |                      | Cocaine w/ U DIF; all others w/ NU DIF                                                                                               | -91,030.58 | 512  | M4.6 vs M3.0  | 58.36   | 46  | .104    |
|           | M4.7   |                      | IDU w/ U DIF; all others w/ NU DIF                                                                                                   | -91,030.27 | 512  | M4.7 vs M3.0  | 57.75   | 46  | .115    |
| 5         | M5.0   | MIMIC                | Combustible tobacco, e-cigarettes, alcohol, cannabis, NMPO w/ NU DIF; cocaine and IDU w/ U DIF; heroin and methamphetamine w/ no DIF | -91,058.89 | 466  | M5.0 vs M3.0  | 114.99  | 92  | .053    |
| 7         | M7.0   | MIMIC                | Constrain class membership on county (class-county association = 0)                                                                  | -91,326.51 | 420  | M7.0 vs M7.1  | 535.24  | 46  | < .0001 |
|           | M7.1   |                      | Class membership on county (freely estimated)                                                                                        | -91,058.89 | 466  |               |         |     |         |

*Note.* LL = Model maximum log likelihood value; npar = number of free parameters; LRT = likelihood ratio test chi-square statistic; df = degrees of freedom; MIMIC = Multiple Indicator Multiple Cause; U DIF = uniform DIF; NU DIF = non-uniform DIF, NMPO = non-medical use of prescription opioids, IDU = injection drug use. Procedure 6 involves evaluating substantive impact of DIF – no statistical tests are done in this procedure, thus its exclusion from the above table.
